# Supplementary material for: The effect of the humanistic care teaching model on nurse patient conflict and nurse turnover intention in a pediatric outpatient department: results of a randomized trial
Source: PubMed Central journal article supplement — Transl Pediatr. 2021 Aug;10(8):2016–23. doi: 10.21037/tp-21-214 (PMC8429853; doi:10.21037/tp-21-214), 2021-08
Supplement: tp-10-08-2016-tp.pdf [file tp-10-08-2016-tp.pdf]

## 1. 研究方案

### (1) 受试者资料

①纳入标准：已考取中华人民共和国护士执业证书；在我院儿科工作；③本研究经医院伦理委员会批准同意，且每位护士知此实验研究的目的是流程并签署知情同意书。

②排除标准：非儿科护士；因请假、外出或进修无法完成培训者；已接受过相关培训者。

### (2) 方法：

①选取 2018 年 9 月-2019 年 9 月于我院儿科工作的 68 名护士作为研究对象，并随机分为实验组和对照组。

②对照组护士接受传统儿科护理带教模式，实验组护士在此基础上增加关怀式护理带教模式。

### (3) 观察指标

①采用本科室自制的《儿科护理人员能力评分表》评价两组护士培训后的各项临床护理能力。

②采用本院自拟的《医护人员职业认同度评分量表》评价两组护士的职业认同感。

③参照《离职意愿量表》<sup>[1]</sup>评估两组护士的离职意愿情况，评分内容包括：寻找其他工作的动机、获得外部工作的可能性、辞去目前工作的可能性。

④采用科室自制的《儿科规范性护理语言考核评分表》评价两组护士对不同情境下护患冲突的解决能力。

⑤采用科室自拟的《患儿护理满意度调查问卷》评价患儿的临床护理满意度

⑥统计学方法：采用 SPSS20.0 软件进行统计分析，计量资料以均数±标准差表示，组间比较采用方差分析。

## 2.技术路线：

①选取我院儿科工作的 68 名护士作为研究对象，将其随机分为对照组和实验组。

②对受试医护人员进行培训。

③培训结束后对护士综合能力进行评价。

④统计学处理。
